1  
2 **Differential viral RNA methylation contributes to pathogen blocking in *Wolbachia*-**  
3 **colonized arthropods**

4 Tamanash Bhattacharya<sup>1,2</sup>, Liewei Yan<sup>3</sup>, Hani Zaher<sup>3</sup> Irene L.G. Newton<sup>1\*</sup>, Richard W. Hardy<sup>1\*</sup>

5 <sup>1</sup>Department of Biology, Indiana University, Bloomington, IN, USA

6 <sup>2</sup>Basic Sciences Division, Fred Hutchinson Cancer Research Center, Seattle, WA, USA

7 <sup>3</sup>Department of Biology, Washington University, St. Louis, MO, USA

8 \*Corresponding authors: ILGN, RWH

9 Email: [irnewton@indiana.edu](mailto:irnewton@indiana.edu), [rwhardy@indiana.edu](mailto:rwhardy@indiana.edu)

10 Tamanash Bhattacharya: 0000-0002-8129-7568

11 Irene L.G. Newton: 0000-0002-7118-0374

12 Richard W. Hardy: 0000-0001-6912-6291

13

14 **Abstract**

15 Arthropod endosymbiont *Wolbachia pipientis* is part of a global biocontrol strategy to reduce the  
16 replication of mosquito-borne RNA viruses such as alphaviruses. We previously demonstrated  
17 the importance of a host cytosine methyltransferase, DNMT2, in *Drosophila* and viral RNA as a  
18 cellular target during pathogen-blocking. Here we report on the role of DNMT2 in *Wolbachia*-  
19 induced alphavirus inhibition in *Aedes* species. Expression of DNMT2 in mosquito tissues,  
20 including the salivary glands, is elevated upon virus infection. Notably, this is suppressed in  
21 *Wolbachia*-colonized animals, coincident with reduced virus replication and decreased infectivity  
22 of progeny virus. Ectopic expression of DNMT2 in cultured *Aedes* cells is proviral, increasing  
23 progeny virus infectivity, and this effect of DNMT2 on virus replication and infectivity is dependent  
24 on its methyltransferase activity. Finally, examining the effects of *Wolbachia* on modifications of  
25 viral RNA by LC-MS show a decrease in the amount of 5-methylcytosine modification consistent  
26 with the down-regulation of DNMT2 in *Wolbachia* colonized mosquito cells and animals.  
27 Collectively, our findings support the conclusion that disruption of 5-methylcytosine modification  
28 of viral RNA is a vital mechanism operative in pathogen blocking. These data also emphasize the  
29 essential role of epitranscriptomic modifications in regulating fundamental alphavirus replication  
30 and transmission processes.

31

32 **Introduction**

33 Viruses are remarkably adept at using a limited set of viral factors to replicate in vastly different  
34 host cell environments. This ability is vital for the success of zoonotic arboviruses, which  
35 encounter physiologically and ecologically distinct invertebrate and vertebrate hosts during  
36 transmission. As these viruses oscillate between vertebrate and arthropod hosts, the progeny  
37 virions reared in one host cell context are primed for the next, predicating successful transmission.  
38 However, arbovirus transmission events are influenced by many host-specific biotic and abiotic  
39 factors (2-6). Recent studies have identified the vector microbiome as a critical biotic factor  
40 influencing arbovirus transmission (5, 6). One notable member of this microbial population is the  
41 arthropod endosymbiont *Wolbachia pipientis*, which dramatically impacts the transmission of  
42 multiple zoonotic arboviruses, a phenomenon termed "pathogen-blocking" (PB) (7-15). *Wolbachia*  
43 is transmitted transovarially and induces a wide range of reproductive manipulations in its host  
44 (16, 17). For example, *Wolbachia*'s presence results in sperm-egg incompatibility between  
45 colonized and non-colonized individuals, mediated by a bacterially-encoded toxin-antitoxin  
46 system (17). This phenomenon, known as cytoplasmic incompatibility (CI), allows *Wolbachia* to  
47 be inherited at a rate higher than Mendelian inheritance, like a natural gene drive. Over the last

48 decade, scientists have leveraged this property to deploy *Wolbachia* as a novel vector control  
49 agent with the aim of either suppressing or replacing the local mosquito population (18). Recent  
50 data suggest that *Wolbachia* release programs significantly reduce the transmission of Dengue  
51 virus (DENV) in endemic regions across 11 territories in Asia and Latin America (19, 20).  
52 Remarkably, however, despite its success, the underlying cellular mechanism of pathogen-  
53 blocking remains unidentified.

54 We recently showed that viral RNA is a cellular target of *Wolbachia*-mediated inhibition and that  
55 loss in progeny virus infectivity occurs at the level of the encapsidated virion RNA, which is  
56 compromised in its ability to replicate in naïve vertebrate cells (1). Mosquito-derived viruses,  
57 reared in the presence of *Wolbachia*, are less infectious when seeded in either mosquito or  
58 vertebrate cells. These results suggest a transgenerational mechanism by which *Wolbachia* limits  
59 virus dissemination within the mosquito and subsequent transmission into vertebrates (1). We,  
60 therefore, speculated that factor(s) regulating pathogen blocking likely target the viral plus sense  
61 RNA genome, a feature shared between all viruses susceptible to *Wolbachia*-mediated inhibition.  
62 Notably, the presence of *Wolbachia* reduces the infectivity of the encapsidated virion RNA in  
63 mammalian cells (1). This observation alone suggests one or more RNA-targeting factors may be  
64 responsible for compromising viral RNA replication in *Wolbachia*-colonized arthropod cells, as  
65 well as in mammalian cells, which are devoid of *Wolbachia*. Prior work has implicated mosquito  
66 exonuclease in pathogen-blocking, which is in line with the reduced half-life of incoming viral  
67 RNAs in *Wolbachia*-colonized cells (1, 21). While faster degradation of viral RNA explains the  
68 observed reduction in virus replication in arthropod cells, it does not explain reduced replication  
69 in mammalian cells. In light of these findings, we sought to focus our attention on the RNA cytosine  
70 methyltransferase DNMT2. Our prior study demonstrated that DNMT2 is essential for pathogen-  
71 blocking in fruit flies (9). As an RNA modifying protein, DNMT2 does not directly antagonize viral  
72 RNA replication but instead influences the cellular fate of its target(s). Both arthropods and  
73 mammals encode proteins capable of interpreting epitranscriptomic signatures on different RNA  
74 species, so we hypothesized that DNMT2-mediated modifications to the viral RNA in *Wolbachia*-  
75 colonized arthropods impact virus replication in arthropod and mammalian cells.

76 To test this hypothesis, we investigated whether DNMT2 is essential for *Wolbachia*-mediated  
77 pathogen blocking in mosquitoes. Additionally, we ask whether this MTase is functionally crucial  
78 to virus regulation in the absence of *Wolbachia*. Given DNMT2's biological role as a cellular RNA  
79 cytosine methyltransferase, we further examined the possibility of m5C modification of viral RNA  
80 in mosquito cells and whether viral RNA is differentially modified in the presence and absence of  
81 *Wolbachia* in mosquito cells. We find that *Wolbachia* and viruses differentially influence MTase  
82 expression in mosquitoes. Specifically, the presence of the virus leads to elevated MTase  
83 expression, which is proviral in mosquito cells. In contrast, the presence of *Wolbachia*  
84 downregulates MTase levels to seemingly disrupt this proviral state, contributing to virus inhibition  
85 as well as reduced progeny virus infectivity. Furthermore, the proviral effect is dependent on the  
86 catalytic activity of DNMT2. Finally, as a consequence of this downregulation and DNMT2's role  
87 as an RNA cytosine MTase, we show that the presence of *Wolbachia* in cells results in a reduced  
88 abundance of 5-methylcytosine (m5C) modification of progeny viral RNA. These changes imply  
89 that m5C modifications play a role in regulating viral RNA infectivity in mammalian cells. In  
90 summary, our findings highlight a previously underappreciated role of RNA methylation in  
91 alphavirus replication, with important implications for virus dissemination and transmission.  
92 Overall, our results indicate a role of the viral epitranscriptome as regulatory signatures capable  
93 of influencing the transmission of other arboviruses.

## 94 **Results**

### 95 **Virus and *Wolbachia* differentially modulate *Aedes* DNMT2 expression**

96 *Wolbachia* in *Aedes* mosquitoes is associated with reduced DNMT2 (*AMt2*) expression (22). We,  
97 therefore, examined the expression of *AMt2* in *wAlbB*-colonized *Aedes aegypti* mosquitoes. We  
98 chose to assess *in vivo* *AMt2* expression changes in whole mosquitos (which would give us a  
99 sense of the *Mt2* environment encountered by disseminating viruses) or in dissected salivary  
100 glands (the tissue important for transmission to the vertebrate host).

101 We measured *AMt2* expression in female *Aedes aegypti* mosquitoes colonized with and without  
102 *Wolbachia* (*wAlbB*) five days post eclosion, forty-eight hours following bloodmeals with and  
103 without Sindbis virus (SINV) (Fig 1B). The presence of both endosymbiont and virus was  
104 associated with altered *AMt2* expression (Two-way ANOVA,  $p < 0.0001$ ), with a nearly 100-fold  
105 increase in *AMt2* levels in *Wolbachia*-free mosquitoes that received an infectious virus-containing  
106 blood meal (Fig 1B. W-/V- compared to W-/V+; Two-way ANOVA,  $p < 0.0001$ ). In contrast, we  
107 found *Wolbachia* to reduce *AMt2* expression in mock-infected individuals (W+/V-) by  
108 approximately 5-fold (Fig 1B, W-/V- compared to W+/V-). Importantly, we also observed low *AMt2*  
109 expression in *Wolbachia*-colonized mosquitoes post-infectious (V+) bloodmeal, indicating that  
110 *Wolbachia* prevents virus-induced stimulation of *AMt2* expression and that these levels are  
111 maintained during infection. Virus replication in *Wolbachia*-colonized mosquitoes, therefore,  
112 occurs in a low *AMt2* environment (Fig 1B. W-/V- compared to W+/V+). This pattern of reduced  
113 *AMt2* expression was also observed *ex vivo* in cultured *Aedes albopictus*-derived mosquito cells  
114 colonized with both a native (*wAlbB* strain in Aa23 cells) and a non-native *Wolbachia* (*wMel* in  
115 RML12 cells) strain (Fig S1).

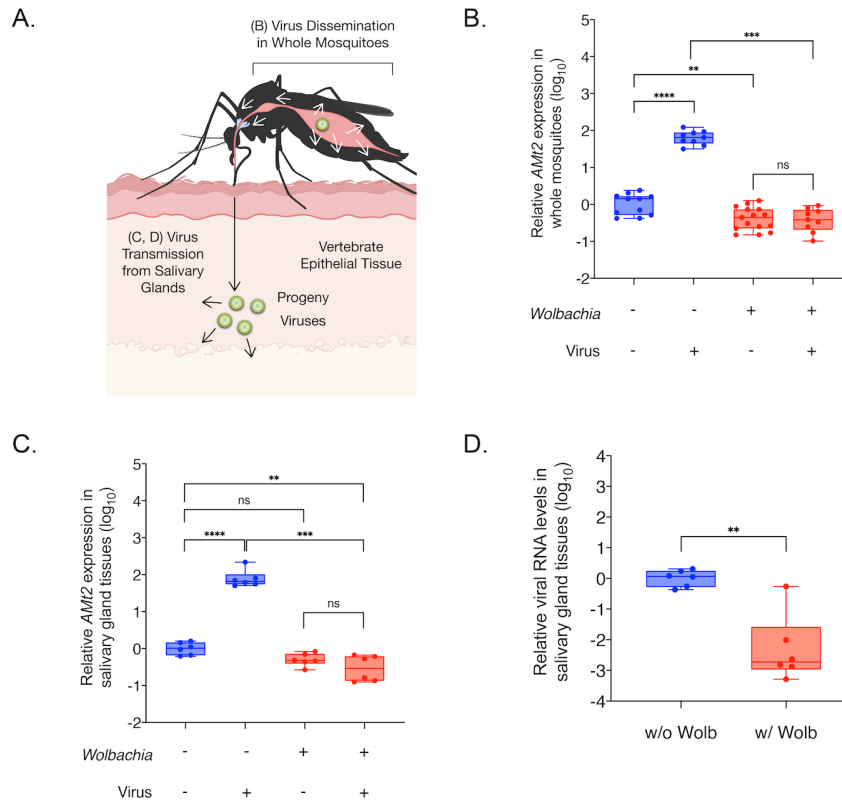

**Fig 1. Virus and *Wolbachia* each differentially modulate expression of the RNA methyltransferase gene DNMT2 in mosquitoes.** (A) Schematic of virus dissemination (white arrows) within mosquito tissues and transmission into vertebrate host (black arrow). (B) *AMt2* expression was measured 5 days post bloodmeal in whole female mosquitoes using qRT-PCR with and without SINV. Error bars represent standard error of mean (SEM) of biological replicates. Two-way ANOVA with Tukey's post-hoc test of multivariate comparisons. (C) *AMt2* expression measured in dissected salivary gland tissues collected from female mosquitoes with and *Wolbachia*-free 5 days post bloodmeal with or without SINV. Error bars represent standard error of mean (SEM) of biological replicates. Two-way ANOVA with Tukey's post-hoc test of multivariate comparisons. (D) Viral RNA levels were quantified in dissected salivary gland tissues with and *Wolbachia*-free using qRT-PCR at 5 days post infectious blood meal with SINV. Unpaired, student's t-test, error bars represent standard error of mean (SEM) of biological replicates. For all panels: \*\*\*\*P < 0.0001; \*\*\*P < 0.001; \*\*P < 0.01; ns = non-significant.

116 We next quantified *AMt2* expression in isolated salivary gland tissues from five-day-old *Aedes*  
 117 *aegypti* mosquitoes colonized with or *Wolbachia*-free (wAlbB), post bloodmeal with (V+) or without  
 118 (V-) SINV (Fig 1C). *AMt2* expression in the salivary gland tissues post-infectious bloodmeal was  
 119 elevated nearly 100-fold, similar to the increase induced by the virus in whole mosquitoes (Fig  
 120 1C. W-/V- compared to W-/V+). As before, the presence of *Wolbachia* alone was associated with  
 121 lower *AMt2* expression. However, this difference was not statistically significant (Fig 1C. W-/V-  
 122 compared to W+/V-). Importantly, however, *Wolbachia* did prevent SINV-induced *AMt2*  
 123 upregulation, reducing it 100-1000 fold (Fig 1C. W-/V+ compared to W+/V+). Under these  
 124 conditions, we also observed a significant 2 to 3  $\log_{10}$  reduction in viral RNA in the salivary gland

125 tissues (Fig 1D). It should be noted that our observations regarding the effect of *Wolbachia*  
126 (*wAlbB*) or SINV on *AMt2* expression are analogous to previous reports that describe differential  
127 *AMt2* expression in the presence of the flavivirus DENV-2 and *Wolbachia* (*wMel*) in *Aedes aegypti*  
128 mosquitoes (22).

### 129 **DNMT2 promotes virus infection in mosquito cells**

130 The positive correlation between *AMt2* expression and SINV genome replication in *Aedes*  
131 mosquitoes (Fig 1B-D) led us to examine whether there is a functional consequence of elevated  
132 MTase expression on virus infection in these insects. We therefore ectopically expressed *AMt2*  
133 and assessed its effect on virus infection in cultured *Aedes albopictus* cells (Fig 2A), using  
134 azacytidine-immunoprecipitation (AZA-IP) to determine whether viral RNA in the cell is a direct  
135 DNMT2 target. *Wolbachia*-free *Aedes albopictus* (C710) cells were transfected with an epitope-  
136 tagged *AMt2* expression vector (FLAG-*AMt2*) or control vector (FLAG-empty) for 48 hours before  
137 infection with SINV at an MOI of 10. After 24 hours post-infection, cells were labeled with a  
138 cytosine analog, 5-Azacytidine (5-AZAC), for 18 hours to incorporate the label into newly  
139 synthesized cellular and viral RNA. We reasoned that if mosquito DNMT2 directly targets viral  
140 RNAs for methylation, the presence of 5-AZAC in the RNA should covalently trap the enzyme  
141 forming a stable m5C-DNMT2-viral RNA complex, allowing co-immunoprecipitation of the RNA-  
142 protein complexes using anti-FLAG antibody (23). Targeted quantitative RT-PCR analyses of total  
143 immunoprecipitated RNA revealed enrichment of SINV RNA relative to a control host RNA  
144 transcript (GAPDH), confirming that viral RNA is indeed a direct MTase target in these cells (Fig  
145 2B).

146 We next assessed the effect of elevated *AMt2* expression on RNA virus infection by measuring  
147 the output of infectious progeny viruses following infection of cells expressing FLAG-*AMt2*.  
148 Ectopic MTase expression resulted in a four-fold increase in SINV titer, further supporting the  
149 positive *in vivo* correlation between *AMt2* expression and virus replication observed previously  
150 (Fig 2C). We also observed a concomitant increase in the per-particle infectivity of viruses upon  
151 assaying them on vertebrate baby hamster kidney fibroblast cells, as evidenced by higher specific  
152 infectivity ratios (Fig 2D). Together these results support the idea of *Aedes* DNMT2 being a  
153 proviral factor exploited by the virus to enhance its replication and transmission in the mosquito  
154 vector.

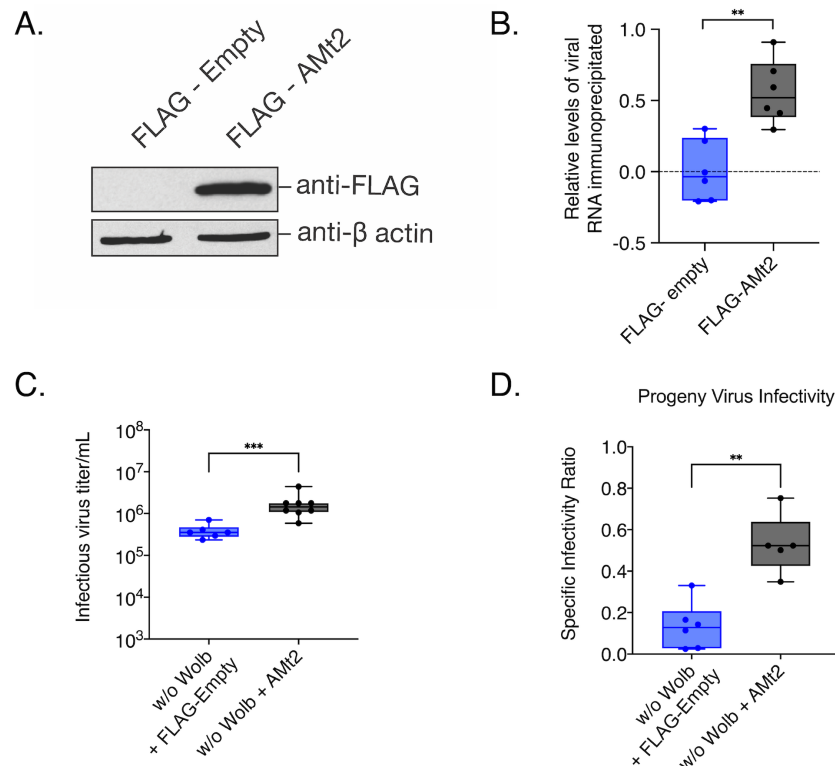

**Fig 2. Overexpressing *AMt2* in mosquito cells improve progeny virus infectivity.** (A) Western Blot of *Aedes albopictus* (C710) cells transfected with expression vector constructs with (FLAG-AMt2) or without (FLAG-empty) *AMt2*. Cytoplasmic lysates of cells were collected 48 hours post transfection and probed with anti-FLAG and anti- $\beta$  actin antibodies. (B) Relative levels of SINV RNA recovered following AZA-IP of *AMt2* in C710 cells was quantified using qRT-PCR. *Wolbachia*-free C710 mosquito cells were transfected with expression vectors FLAG-empty or FLAG-AMt2 for 48 hours prior to infection with SINV at MOI of 10. Cells were treated for approximately 18h with 5  $\mu$ M 5-Azacytidine to covalently trap *AMt2* with its target cellular RNA prior to RNA immunoprecipitation using anti-FLAG antibody. The horizontal dotted line represents the threshold set at 1 ( $\log_{10}$ ). Unpaired two-tailed t-test with Welch's correction,  $p = 0.0004$ ,  $t = 4.216$ ,  $df = 20$  (C) Infectious progeny (PFU/mL) SINV produced from mosquito cells *Wolbachia*-free expressing either FLAG-empty (w/o Wolb) or FLAG-AMt2 (w/o Wolb + *AMt2*). Cells were transfected 48 hours prior to infection with SINV at MOI of 10. Infectious progeny viruses collected from supernatants 48 hours post-infection were quantified using plaque assays on BHK-21 cells. Unpaired two-tailed t-test with Welch's correction,  $p = 0.0002$ ,  $t = 5.404$ ,  $df = 11.81$ . (D) Specific Infectivity Ratios of progeny SINV were calculated as described earlier (1). Unpaired two-tailed t-test with Welch's correction,  $p = 0.0084$ ,  $t = 3.911$ ,  $df = 5.820$ . For all panels error bars represent standard error of mean (SEM) of biological replicates and \*\* $P < 0.01$ ; \*\*\*\* $P < 0.0001$ .

156 *AMt2* expression is reduced in the presence of *Wolbachia*. To test whether virus restriction *in vivo*  
157 is a consequence of reduced DNMT2 activity, we measured virus replication in mosquito cells  
158 following pharmacological inhibition of DNMT2. Structural homology of DNMT2 to other members  
159 of the DNA MTase family has allowed it to retain its DNA binding ability *in vitro*. However, they  
160 are canonically known to methylate tRNA molecules (24). Furthermore, DNMT2 is known to  
161 methylate RNA substrates by a different mechanism than canonical RNA methyltransferases.  
162 This mechanism of action makes DNMT2 susceptible to the action of DNA methyltransferase

163 inhibitors ribo- (5-Azacytidine or 5-AZAC) or deoxyribo- (Deoxy-5-Azacytidine or DAC5) while  
164 ensuring that the function of other RNA methyltransferases in the cell remain unperturbed (25,  
165 26). We reasoned that pretreatment of mosquito cells with either MTase inhibitor should reduce  
166 cellular DNMT2 activity and consequently restrict alphavirus replication. Pretreating *Wolbachia*-  
167 free C710 cells with RNA MTase inhibitor 5-AZAC prior to infection reduced SINV RNA replication  
168 approximately 5-fold at 24 hours post-infection (Fig 3A). Virus titer was also reduced  
169 approximately 10-fold (Fig 3B). Finally, MTase inhibition also negatively influenced SINV per-  
170 particle infectivity, as evidenced by a 50-fold reduction in SI ratio (Fig 3C). Similar results were  
171 obtained for related alphavirus, Chikungunya virus (CHIKV, Fig S2A,B).

172 Using our previously published live-cell imaging system, we used a fluorescently-tagged CHIKV  
173 reporter virus (CHIKV-mKate) to examine the effect of deoxyribo- MTase inhibitor DAC5 on virus  
174 replication in *Wolbachia*-free and *Wolbachia*-colonized *Aedes albopictus* cells using the Incucyte  
175 live-cell imaging platform (1). As before, fluorescent protein expression was used as a proxy of  
176 virus replication in cells with (DAC5) and without (DMSO) inhibitor pretreatment. Virus replication  
177 was measured over 50 hours by quantifying mean virus-encoded red fluorescent reporter (mKate)  
178 expression observed over four distinct fields of view taken per well every 2-hours (Fig 3D, S2C).

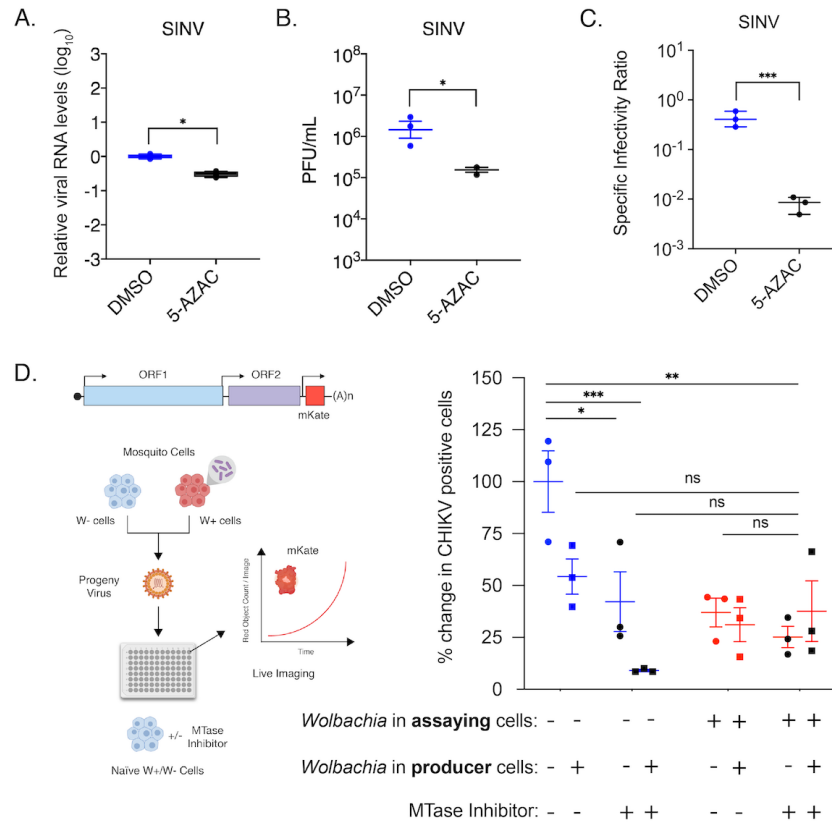

**Fig 3. Pharmacological inhibition of mosquito DNMT2 reduces virus replication and per-particle infectivity.** Inhibition of mosquito DNMT2 in *Wolbachia*-free *Aedes albopictus* derived C710 cells was carried out using MTase inhibitors 5-Azacytidine (5-AZAC). Dimethyl-sulfoxide (DMSO) was used as the negative control. In each case, cells were pretreated with 5  $\mu$ M inhibitors overnight prior to infections with SINV at MOI of 10. Cell lysates and supernatants were harvested at 24 hours post infection to quantify cellular viral RNA levels and infectious titer, respectively. (A) Levels of SINV RNA in mosquito cells treated with MTase inhibitor 5-AZAC were determined using quantitative RT-PCR. Unpaired two-tailed t-test with Welch's correction, SINV:  $p = 0.0012$ ,  $t = 6.742$ ,  $df = 4.892$ . (B) Infectious SINV titers produced from mosquito cells treated with MTase inhibitor 5-AZAC were determined using plaque assays on BHK-21 cells. Unpaired two-tailed t-test with Welch's correction, SINV:  $p = 0.0339$ ,  $t = 4.541$ ,  $df = 2.322$ . (C) Specific infectivity ratios of progeny SINV was calculated as the ratio of infectious plaque forming units (B) over total viral genome copies present in collected cell supernatants as quantified by qRT-PCR. Unpaired two-tailed t-test with Welch's correction, SINV:  $p = 0.0002$ ,  $t = 12.59$ ,  $df = 3.946$ . Error bars represent standard error of mean (SEM) of three independent experimental replicates. (D) CHIKV expressing mKate fluorescent reporter protein was grown in C710 *Aedes albopictus* cells in the presence (W+ virus) or absence (W- virus) of *Wolbachia* (strain wStri). These progeny viruses were then used to infect C710 cells without and with *Wolbachia* (strain wStri) pretreated with MTase inhibitor DAC5 (black data points) or DMSO (blue data points for *Wolbachia* free cells, red data points for *Wolbachia* colonized cells) synchronously at a MOI of 1 particle/cell. Virus growth in cells was measured in real time by imaging and quantifying the number of red cells expressing the virus encoded mKate protein forty-eight hours post infection, using live cell imaging. Shape of data points represent the origin of virus used to initiate infection; circles represent viruses derived from W- cells, boxes represent viruses derived from W+ cells. Three-way ANOVA with Tukey's post hoc test for multivariate comparisons. For all panels error bars represent standard error of mean (SEM) of independent experimental replicates ( $n=3$ ). \* $P < 0.05$ ; \*\* $P < 0.01$ ; \*\*\*\* $P < 0.0001$ , ns = non-significant.



180 In line with previous observations, viruses derived from *Wolbachia*-colonized cells (*W*<sup>+</sup> virus, we  
181 will refer to viruses derived from *Wolbachia*-colonized cells as *W*<sup>+</sup> and their counterparts, derived  
182 from *Wolbachia*-free cells as *W*<sup>-</sup> virus), produced under low *AMt2* conditions, are less infectious  
183 on *W*<sup>-</sup> cells, limiting their dissemination (1). Notably, this phenotype is particularly pronounced  
184 when *W*<sup>+</sup> viruses encounter cells also colonized with the endosymbiont, presumably exhibiting  
185 reduced *AMt2* expression (Fig 3D, S2D-E). To further investigate the importance of DNMT2  
186 activity in *Wolbachia*-mediated virus inhibition we treated cultured *Aedes albopictus* (C710) cells  
187 with DAC5, a DNMT2 inhibitor. We predicted that replication kinetics of *W*<sup>+</sup> viruses in inhibitor-  
188 treated *Wolbachia*-free (*W*<sup>-</sup>) cells should phenocopy kinetics of *W*<sup>+</sup> virus replication in *Wolbachia*-  
189 colonized (*W*<sup>+</sup>) cells. Additionally, the kinetics of *W*<sup>-</sup> virus replication in inhibitor-treated  
190 *Wolbachia*-free (*W*<sup>-</sup>) cells should phenocopy *W*<sup>-</sup> virus replication in *Wolbachia*-colonized (*W*<sup>+</sup>)  
191 cells (1). Three-way ANOVA was used to determine the effect of MTase inhibitor (DAC5), progeny  
192 virus type (derived from producer cells with or *Wolbachia*-free), and/or time on virus replication in  
193 recipient cells (assaying cells with or *Wolbachia*-free). In the presence of MTase inhibitor,  
194 replication of both *W*<sup>-</sup> and *W*<sup>+</sup> viruses was reduced throughout infection, with a greater decrease  
195 in the replication of *W*<sup>+</sup> viruses relative to *W*<sup>-</sup> viruses phenocopying the replication of *W*<sup>+</sup> viruses  
196 in *Wolbachia*-colonized cells. Finally, replication of *W*<sup>-</sup> viruses in the presence of inhibitor was  
197 comparable to that of *W*<sup>+</sup> viruses in mock-treated *Wolbachia*-free cells. We observed no  
198 synergistic effect of virus source and MTase inhibitor on virus replication in *Wolbachia*-colonized  
199 cells, likely due to low mean reporter activity. Altogether, these results demonstrate that  
200 alphavirus replication is negatively impacted by perturbed DNMT2 activity in either producer (*W*<sup>+</sup>  
201 virus) or recipient mosquito cells (*W*<sup>-</sup> + DAC5 cells or *W*<sup>+</sup> cells) and that the effect is compounded  
202 when both co-occur (*W*<sup>+</sup> virus in *W*<sup>-</sup> + DAC5 cells or *W*<sup>+</sup> virus in *W*<sup>+</sup> cells).

### 203 **Ectopic DNMT2 expression rescues alphaviruses from *Wolbachia*-mediated inhibition**

204 Evidence gathered indicates that *AMt2* downregulation is responsible for pathogen blocking in  
205 mosquitoes. Therefore, we ectopically overexpressed *AMt2* in *Wolbachia*-colonized mosquito  
206 cells to alleviate virus inhibition, including disruption of viral RNA synthesis and progeny virus  
207 infectivity (Fig 4A). We observed a significant reduction in viral RNA levels in *Wolbachia*-colonized  
208 cells relative to *Wolbachia*-free cells (Fig 4B). Interestingly, expression of FLAG-*AMt2* increased  
209 SINV RNA levels 70-fold in *Wolbachia*-colonized cells compared to cells carrying FLAG-empty  
210 vector, restoring virus RNA synthesis; One-way ANOVA Holm-Sidak's multiple comparisons test,  
211 w/ Wolb vs. w/ Wolb + *AMt2*,  $p < 0.0001$  (Fig 4B). Additionally, we observed a significant  
212 improvement in per-particle infectivity of progeny viruses derived from *Wolbachia*-colonized cells  
213 ectopically expressing *AMt2* (*W*<sup>+</sup> *AMt2*<sup>+</sup> virus, Fig 4C). Therefore, both phenotypes of pathogen  
214 blocking were abrogated upon *AMt2* over-expression. Given that endosymbiont titers can  
215 influence the degree of virus inhibition, we checked whether altering *AMt2* levels significantly  
216 impacted *Wolbachia* titer in cells. Quantitative PCR was used to measure relative *Wolbachia* titer  
217 in cells transfected with FLAG-*AMt2* or FLAG-empty. However, no changes in endosymbiont titer  
218 were observed following ectopic *AMt2* expression (Fig 4D). Therefore, changes in *Wolbachia* titer  
219 do not explain the loss of pathogen blocking.

220

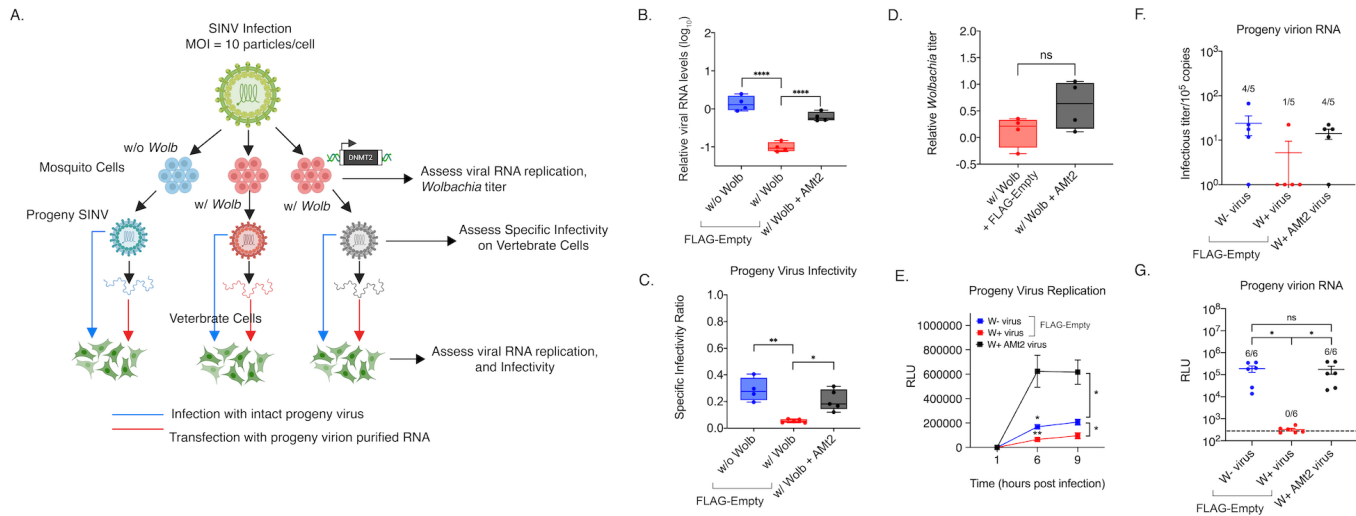

**Fig 4. *Amt2* overexpression in *Wolbachia*-colonized cells rescues virus from endosymbiont-mediated inhibition.** C710 cells with *Wolbachia* were transfected with expression vectors FLAG-empty (w/ Wolb) or FLAG-*Amt2* (w/ Wolb + *AMt2*) for 48 hours prior to infection with SINV-nLuc at MOI of 10. *Wolbachia*-free cells expressing FLAG-empty (w/o Wolb) were used as a positive control. (A) Schematic of experimental workflow. (B) Viral genome replication in C710 cells was quantified using qRT-PCR using extracted total RNA from infected cell lysates. One-way ANOVA with Tukey's post-hoc test of multivariate comparison. (C) Specific Infectivity Ratios of progeny viruses produced from the aforementioned infection was calculated as described earlier (1). Briefly, infectious progeny viruses collected from supernatants 48 hours post infection were quantified using plaque assays on BHK-21 cells, while total number of progeny virus particles was quantified via qRT-PCR of viral genome copies released into the supernatant. Error bars represent standard error of mean (SEM). One-way ANOVA with Tukey's post-hoc test of multivariate comparison, w/ Wolb vs w/ Wolb + *AMt2*,  $p = 0.0003$ , w/o Wolb vs w/ Wolb,  $p < 0.0001$ . (D) C710 mosquito cells with *Wolbachia* were transfected with expression vectors FLAG-empty (w/ Wolb) or FLAG-*Amt2* (w/ Wolb + *AMt2*) for 48 hours prior to quantification of endosymbiont titer via quantitative PCR using DNA from extracted cell lysates. Error bars represent standard error of mean (SEM). Unpaired, student's t-test,  $p = 0.1316$ ,  $t = 1.794$ ,  $df = 5.097$ . Statistically non-significant values are indicated by ns. (E) Progeny viruses were used to synchronously infect naïve BHK-21 cells at equivalent MOIs of 5 particles/cell. Cell lysates were collected at indicated times post infection and luciferase activity (RLU), was used as a proxy for viral replication. Two-way ANOVA with Tukey's post-hoc test of multivariate comparison, Time:  $p < 0.0001$ , *Wolbachia/AMt2*:  $p = 0.0003$ , Time x *Wolbachia/AMt2*:  $p < 0.0001$ . (F) Approximately 10<sup>5</sup> copies (determined using qRT-PCR) each of virion encapsidated RNA extracted from the aforementioned W+, W+ *AMt2* and W- viruses were transfected into naïve BHK-21 cells and infectious titer was determined by the counting the number of plaques produced after 72 hours post transfection. Numbers above bars refer to the proportion of samples that formed quantifiable plaque-forming units on BHK-21 cells. One-way ANOVA with Tukey's post-hoc test of multivariate comparison. (G) 10<sup>5</sup> copies each of virion encapsidated RNA extracted from the W+, W+ *AMt2* and W- viruses were transfected into naïve BHK-21 cells and luciferase activity (RLU) was used as a proxy for viral replication at 9 hours post-transfection. Numbers above bars refer to the proportion of samples that produced luciferase signal above background levels, indicated by the dotted line. One-way ANOVA with Tukey's post-hoc test of multivariate comparison, w/ Wolb vs w/ Wolb + *AMt2*:  $p < 0.00001$ , w/o Wolb vs w/ Wolb:  $p < 0.0001$ ; w/o Wolb vs w/ Wolb + *AMt2*:  $p = 0.991$ . For all panels error bars represent standard error of mean (SEM). \* $P < 0.05$ ; \*\* $P < 0.01$ ; \*\*\*\* $P < 0.0001$ .

222 Reduced per-particle infectivity of viruses occurring in the presence of *Wolbachia* (W+ viruses) is  
223 associated with reduced replication kinetics of these viruses in vertebrate cells and reduced  
224 infectivity of the encapsidated W+ virion RNA (1). As *AMt2* overexpression in *Wolbachia*-  
225 colonized mosquito cells rescued viral RNA synthesis and progeny virus infectivity, we examined  
226 the ability of progeny viruses derived from *Wolbachia*-colonized cells overexpressing *AMt2* (W+  
227 derived *AMt2*+ cells) to replicate in vertebrate cells. We used SINV encoding a luciferase reporter  
228 for these experiments, allowing viral replication kinetics to determine the following synchronous  
229 infection of three progeny virus types: W- derived virus, W+ derived virus, and W+ derived *AMt2*+  
230 virus. Replication of W+ derived *AMt2*+ viruses was significantly higher on a per-particle basis  
231 relative to W+ derived and, interestingly, W- derived viruses. This could be due to higher ectopic  
232 *AMt2* expression relative to what is induced natively during virus infection, implying perhaps a  
233 dose-dependent effect (Fig 4E). We then examined whether ectopic *AMt2* expression caused  
234 changes in the infectivity of the encapsidated virion RNA itself. Based on results from Fig 3D, we  
235 hypothesized that ectopic *AMt2* expression in *Wolbachia*-colonized cells should restore virion  
236 RNA infectivity. Indeed, following transfection of virion RNA into vertebrate BHK-21 cells, W+  
237 derived virus RNA was largely non-infectious in contrast to RNA derived from viruses derived  
238 from W- and W+ *AMt2*+ cells (Fig 4F). Restored infectivity of W+ *AMt2*+ derived viral RNA was  
239 also validated using the luciferase-based virus replication assay (Fig 4G).

240 As demonstrated in Fig 2B, DNMT2 possesses the ability to bind viral RNA in mosquito cells.  
241 However, this alone does not indicate whether its MTase activity is essential for its proviral role.  
242 Broadly, DNMT2 comprises a catalytic domain and a target recognition domain responsible for  
243 RNA binding (27, 28). It is, therefore, possible that DNMT2's regulatory role is independent of its  
244 MTase activity. To determine the importance of catalytic activity, we overexpressed a catalytically-  
245 inactive mutant of *AMt2*, replacing the highly conserved cysteine residue (C78) present in the  
246 motif IV region with a glycine (*AMt2* C78G, Fig 5A) in *Wolbachia*-colonized mosquito cells and  
247 asked whether this allele is capable of relieving pathogen blocking. Our data show *AMt2*-mediated  
248 rescue of SINV RNA synthesis and infectivity depends on its MTase activity as expression of the  
249 C78G mutant failed to rescue virus from *Wolbachia*-mediated inhibition (Fig 5B). We observed no  
250 improvement in SINV infectivity under these conditions (Fig 5C). Similar results were obtained  
251 from experiments carried out using CHIKV, where expression of wild-type *AMt2*, but not *AMt2*-  
252 C78G, resulted in improved virus titer (Fig 5D). However, while expression of *AMt2* increased  
253 CHIKV specific infectivity compared to expression of *AMt2*-C78G this increase was not  
254 statistically significant (Fig 5E). Based on these results, we conclude that the MTase *AMt2*  
255 promotes virus infection in mosquitoes and that lower *AMt2* expression in the presence of  
256 *Wolbachia* contributes to virus restriction and that MTase activity of DNMT2 is required for proviral  
257 function.

258

259

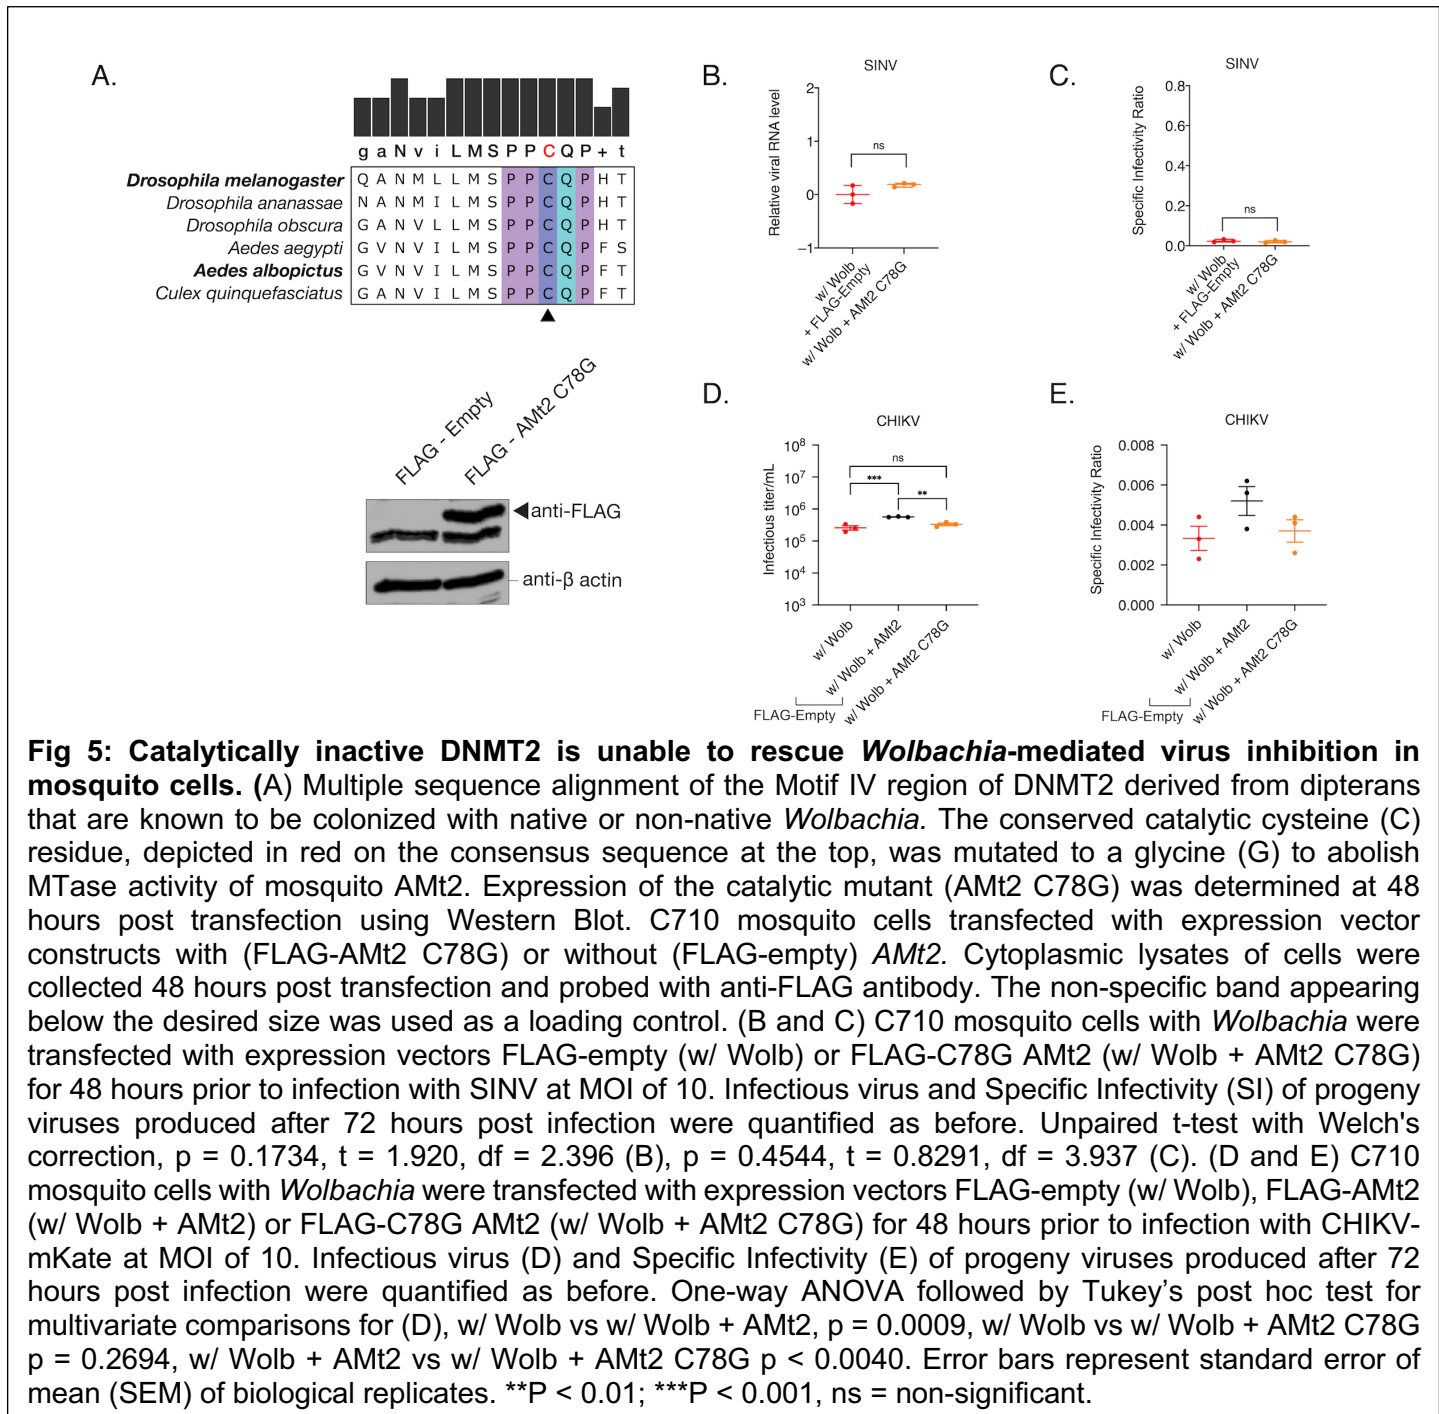

260

261 **DNMT2 orthologs from mosquitoes and fruit flies regulate virus infection differentially in**  
 262 **their respective hosts**

263 The proviral role of the AMt2 is intriguing, given the previously described antiviral role for the  
 264 corresponding fruit fly ortholog, Mt2 (9, 29). Interestingly, in our previous study, we observed that  
 265 knocking down Mt2 led to increased progeny virus infectivity. Therefore, we reasoned that ectopic

266 expression of *Mt2* should reduce Sindbis virus infectivity (Fig S3). As with mosquito *AMt2*, we  
267 asked whether this involved direct targeting of viral RNA. AZA-IP of epitope-tagged *Mt2* confirmed  
268 direct interactions between viral RNA and fly DNMT2 in *Wolbachia*-free *Drosophila melanogaster*-  
269 derived JW18 cells, which showed a 10-fold enrichment in SINV RNA-binding relative to a control  
270 host transcript (18S) (Fig S3A, B).

271 In contrast to the proviral effect of mosquito *AMt2*, ectopic *Mt2* expression significantly reduced  
272 infectivity of progeny SINV and CHIKV (*W*- derived *Mt2*+ virus) relative to those produced from  
273 cells expressing the control vector (*W*- derived virus), confirming our previous findings (Fig S3C).  
274 As with *AMt2*, we assessed whether reduced infectivity of *W*- derived *Mt2*+ viruses was due to  
275 their inability to replicate in vertebrate cells. Indeed, results from our luciferase reporter based  
276 viral replication assay revealed significantly reduced replication of *W*- *Mt2*+ derived viruses  
277 relative to *W*- derived viruses in vertebrate BHK-21 cells, similar to the behavior observed for *W*+  
278 derived viruses (Fig S3D). Finally, we quantified the infectivity of virion encapsidated RNA from  
279 *W*- derived *Mt2*+ SINV and CHIKV viruses by measuring the number of plaque-forming units  
280 generated following transfection into vertebrate BHK-21 cells. For both SINV and CHIKV, the  
281 infectivity of virion encapsidated RNA was reduced for *W*+ viruses. Notably, this was phenocopied  
282 by virion RNA isolated from *W*- *Mt2*+ derived SINV and CHIKV (Fig S3E,F).

283 Similar to mosquito *AMt2*, fly *Mt2*'s ability to regulate virus fitness also rely on its catalytic activity,  
284 as expressing a catalytically inactive mutant (*Mt2* C78A) was unable to restrict the production of  
285 infectious virus and per-particle infectivity of SINV (Fig S4). Taken together, these results suggest  
286 that progeny virus/virion RNA infectivity is reduced in fly cells under conditions where MTase  
287 expression is elevated natively in the presence of *Wolbachia* (*W*+ virus) or artificially (*W*- *Mt2*+  
288 virus).

### 289 **The presence of *Wolbachia* in mosquito cells is associated with altered viral RNA** 290 **methylation**

291 That ectopic *AMt2* expression in *Wolbachia*-colonized *Aedes albopictus* cells can restore the  
292 infectivity of SINV progeny virion RNA implies two important things; (i) Sindbis virion RNA carries  
293 5-methylcytosine (m5C) modifications, and (ii) that altered *AMt2* expression in the presence of  
294 *Wolbachia* is associated with changes in the overall m5C content of the virion RNA. To directly  
295 determine if virus RNA is modified differentially in the presence of *Wolbachia*, we subjected virion  
296 RNA isolated from progeny SINV produced from *Aedes albopictus* cells colonized with (*W*+ virus)  
297 and without (*W*- virus) *Wolbachia* to liquid chromatography tandem mass spectrometry (LC-  
298 MS/MS) analyses (Fig 6A). We chose to focus our efforts on identifying the presence of 5-  
299 methylcytosine (m5C) and 6-methyladenosine (m6A) residues on the viral genome for our present  
300 analyses. We examined m6A due to recent reports highlighting the importance of this modification  
301 in regulating RNA virus replication (30, 31). A potential complication for these analyses is the  
302 presence of residue(s) of similar mass to charge ratio(s) to m5C, such as m3C. However, as  
303 shown in Fig S5A, we observed distinct distribution of the individual m3C and m5C peaks in the  
304 spectral output, demonstrating our ability to distinguish between these two bases (Fig S5A).

305

306

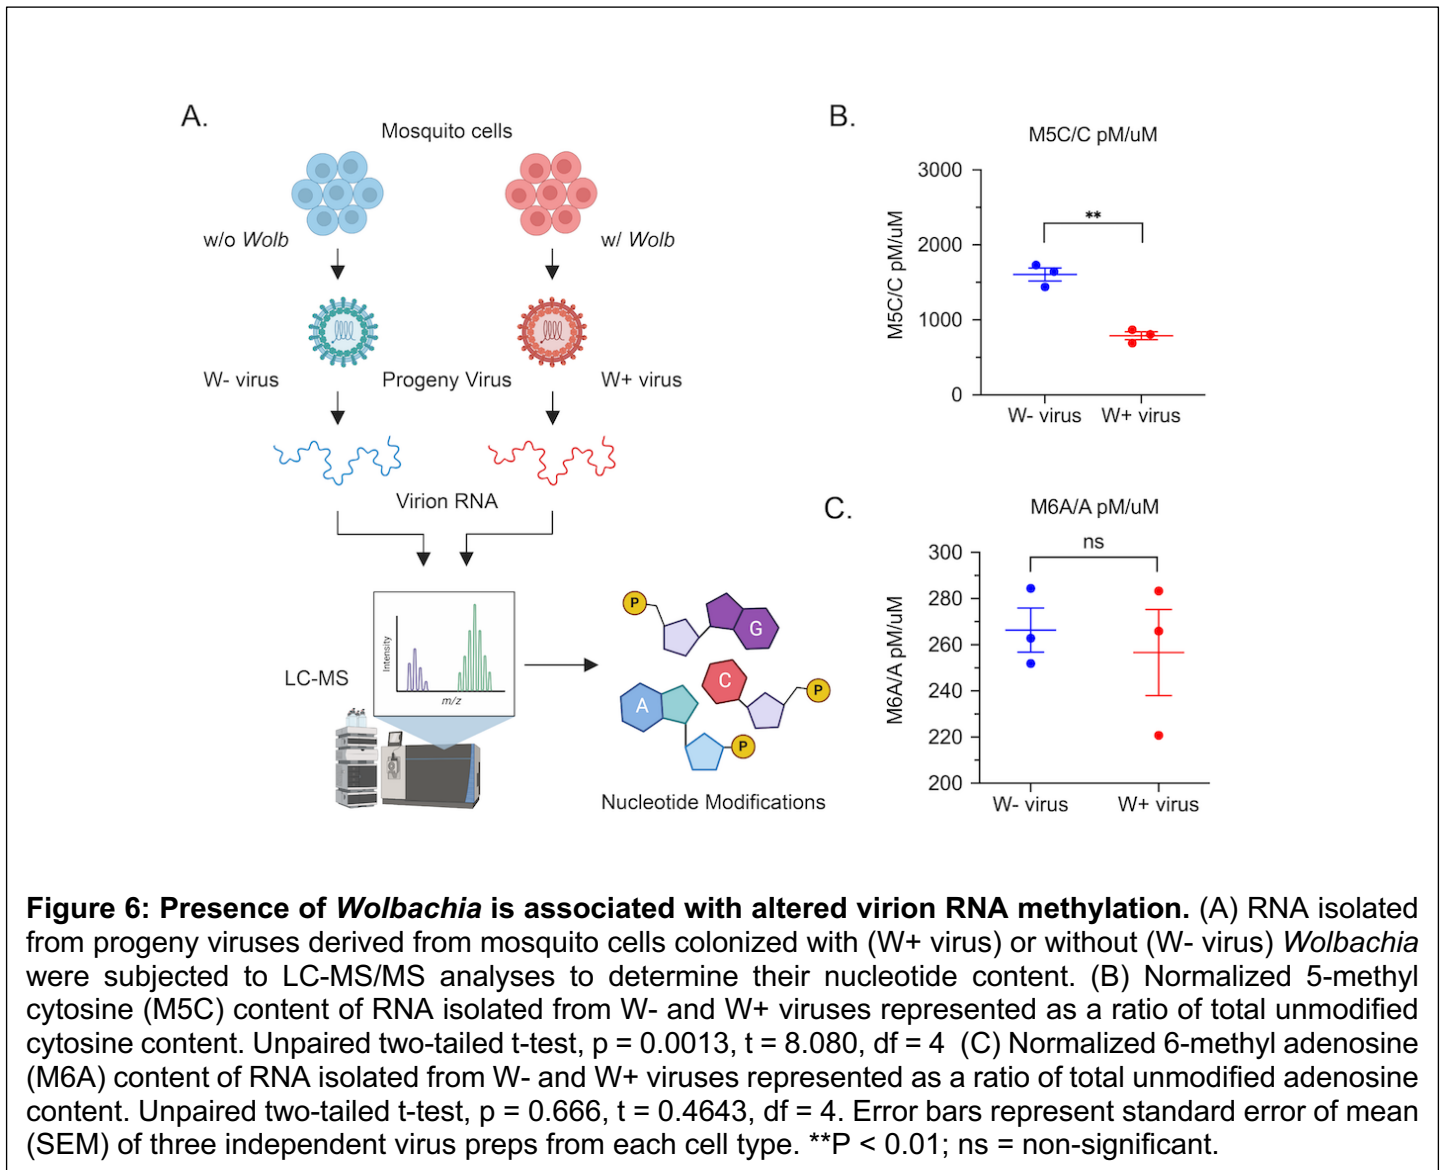

307

308 LC-MS/MS analyses of RNA purified from virion RNA derived from *Wolbachia* free (*W-*) and  
309 *Wolbachia*-colonized (*W+*) cells demonstrated *W+* virion RNA to contain, on average, more than  
310 2-fold fewer m5C residues compared to *W-* virion RNA across three independent virus preps from  
311 each cell type (Fig 6B). Notably, both *W+* and *W-* virion RNA was determined to consist of  
312 comparable levels of m6A residues across all biological replicates (Figure 6C). In addition, we  
313 observed no significant changes in the overall m3C content between *W+* and *W-* virion RNA (Fig  
314 S5B). It should be noted that while we did not observe changes in the overall abundance of m6A  
315 and m3C residues between *W+* and *W-* virion RNA, it is unclear whether the presence of  
316 *Wolbachia* leads to altered distribution of m6A and/or m3C modifications in the context of the  
317 overall SINV RNA sequence. Finally, we used LC-MS/MS analyses to quantify viral Type-0 (7-  
318 methyl-GpppNp or M7G) cap structures present in *W-* and *W+* virion RNA to estimate relative  
319 ratios of capped versus non-capped virus progeny produced in the presence or absence of  
320 *Wolbachia*. While there were no statistically significant differences present between the respective

321 W- and W+ sample means (t-test:  $p=0.999$ ), we found M7G content to vary significantly among  
322 W+ virion RNA replicates (F-test:  $p=0.0088$ ), indicating either that the ratios of capped vs. non-  
323 capped viruses vary significantly within virus populations derived from *Wolbachia*-colonized cells,  
324 or that viral RNAs produced under these conditions carry varying amounts of internal M7G  
325 signatures (Fig S5C).

326 These data are consistent with: (i) DNMT2 being an essential host factor in mosquito cells for  
327 efficient virus replication and transmission, (ii) this proviral effect being exert through m5C  
328 modification of the viral genomic RNA, and (iii) a mechanism of *Wolbachia*-mediated pathogen  
329 blocking being the reduction of DNMT2 expression.

330

## 331 Discussion

332 Virus inhibition in *Wolbachia*-colonized arthropods is associated with two distinct features  
333 independent of any particular host-*Wolbachia* strain combination; (i) reduced genome replication  
334 of the +ssRNA viruses in *Wolbachia*-colonized cells, and (ii) reduced per-particle infectivity of  
335 progeny +ssRNA viruses produced under these conditions (1). While these shared attributes  
336 constitute a subset of several virus inhibition phenotypes, it indicates the existence of a conserved  
337 cellular mechanism of restriction. In our previous study, we used the prototype alphavirus, Sindbis  
338 as our +ssRNA virus model to uncover an essential role of the fruit fly RNA cytosine  
339 methyltransferase (MTase) gene *Mt2* (DNMT2) as an essential host determinant of *Wolbachia*-  
340 mediated pathogen blocking (9). Furthermore, loss of *Drosophila* DNMT2 is associated with a  
341 loss in virus inhibition by *Wolbachia* and increased progeny virus infectivity in mammalian cells,  
342 suggesting that DNMT2 might regulate these two aspects of alphavirus replication. These findings  
343 thus led us to ask the following question in our present study: Is DNMT2 a conserved host  
344 determinant of *Wolbachia*-mediated +ssRNA virus inhibition between fruit flies and mosquitoes?

345 MTase expression in adult *Aedes aegypti* mosquitoes is distinctly altered in the presence of both  
346 virus and *Wolbachia* and in opposite directions (Fig 1). DNMT2 expression is elevated in the body  
347 of mosquitoes following an infectious bloodmeal. Notably, this pattern is observed in the salivary  
348 gland tissues, representing the final site of virus production in the vector prior to transmission to  
349 a vertebrate. We show that this is beneficial to the virus, as ectopic MTase expression in cultured,  
350 *Wolbachia*-free *Aedes albopictus* mosquito cells promotes virus replication and, importantly,  
351 progeny virus infectivity. This has also been reported for DENV-2 infection in *wMel*-colonized  
352 *Aedes aegypti* mosquitoes (22). We observed that baseline MTase activity is required for virus  
353 replication and spread in *Aedes* cells (Fig S2). Furthermore, the extent to which virus replication  
354 is affected by MTase inhibitors depends on the virus source, with viruses produced from  
355 *Wolbachia*-colonized cells (W+ viruses) being more susceptible to MTase inhibition.

356 This outcome phenocopies the scenario in which virus spread is most restricted under conditions  
357 where both producer and target mosquito cells are colonized with *Wolbachia* (1). In line with these  
358 findings, our data indicate a decrease in MTase expression occurs in the presence of *Wolbachia*  
359 (Fig 1). This observation is in line with previous reports (22). Thus, our collective data support a  
360 model in which endosymbiont-dependent inhibition of MTase expression and catalytic MTase  
361 function contribute to reduced virus replication and per-particle infectivity in mosquitos (Fig 2-4).  
362 This consequently limits virus dissemination within the vector and transmission to a vertebrate  
363 host (Fig 2-4). Given that our results are coherent with prior reports involving a different RNA virus  
364 and *Wolbachia* strain, the interaction between virus, *Wolbachia*, and host MTase expression is  
365 likely independent of any particular virus-host-*Wolbachia* combination, representing a conserved  
366 feature of pathogen blocking in the native *Aedes* vector.

367 Our data demonstrate an interaction between DNMT2 orthologs from *Aedes albopictus* and  
368 *Drosophila melanogaster* and viral RNA (Fig 5B, Fig S4B) (1). However, it remains to be seen  
369 whether these interactions are analogous to DNMT2-DCV RNA interactions in *Drosophila*, where  
370 the MTase-viral RNA binding occurs specifically at structured viral Internal Ribosomal Entry Sites  
371 (IRES) (29). Additionally, it is unclear if DNMT2 interactions in the mosquito cell are specific for  
372 viral RNA or whether it extends to host transcripts. Future studies involving PAR-CLIP-sequencing  
373 of immunoprecipitated DNMT2-RNA complexes should allow the identification and mapping of  
374 distinct DNMT2-binding motifs and/or structural elements within viral and host RNA species.  
375 Nevertheless, sites of DNMT2 recruitment to viral RNA, and viral and host proteins are required  
376 for recruitment remain unidentified. Assuming that the proviral role of *Aedes* DNMT2 involves the  
377 addition of m5C signatures to specific residues on the viral genome, it seems likely that viral co-  
378 factor(s) are required for specificity. *Drosophila* DNMT2 is antiviral in fruit flies, however  
379 *Drosophila* is not a natural host for alphaviruses, and it is likely that the adaptation of the virus to  
380 the natural vector has facilitated an appropriate proviral interaction with *Aedes* DNMT2 or an  
381 associated *Aedes*-specific host factors(s) absent in *Drosophila melanogaster* (32).

382 The m5C content of virion RNA produced from *Wolbachia*-colonized cells (*W+* viruses) is  
383 significantly reduced relative to cells without the symbiont (Fig 6B) (1), consistent with DNMT2s  
384 role as a cytosine MTase. Incidentally, this finding follows reports dating back several decades  
385 describing the occurrence of m5C residues within intracellular SINV RNA (33). Relative  
386 abundance of methylated to total cytosine residues on SINV virion RNA derived from *Wolbachia*-  
387 free mosquito cells is 15:10000, accounting for cytosine content in the viral genome we predict  
388 there to be 4 to 5 m5C signatures per encapsidated virion RNA genome produced in *Aedes*  
389 *albopictus* cells. Our observation supports the involvement of these intracellular m5C signatures  
390 in alphavirus genome replication that *W+* virion RNA, which are presumably hypomethylated, are  
391 less infectious on a per-genome basis (Fig 4E-F) (34). Indeed, based on our data, we can infer  
392 that these m5C modifications regulate alphavirus infection across multiple hosts and, thus, by  
393 extension, aspects of the virus transmission cycle. It should also be noted that while methylated  
394 nucleotide residues like m6A and m5C occur on RNA virus genomes at higher rates than those  
395 present in cellular RNA species, our results do not exclude the possibility of other RNA  
396 modifications, as well as differential modification of host RNA species and playing a role in  
397 regulating virus replication and transmission. This may be of particular consequence given recent  
398 evidence of altered m6A modification of specific cellular transcripts during flavivirus infection in  
399 vertebrate cells (31, 35, 36).

400 Alphaviruses derived from mosquito cells are more infectious on vertebrate cells on a per-particle  
401 basis than vertebrate cell-derived viruses and vice versa (37). This carries the implication that  
402 progeny viruses originating from one cell type may possess intrinsic properties that can confer a  
403 fitness advantage while infecting a destination host cell type, altering their infectivity on these  
404 destination cells on a per-particle level. As to what such properties may represent, current  
405 evidence points towards differences in virus structure, such as differential sialation or  
406 glycosylation of viral glycoproteins impacting host receptor-binding and/or differences in the  
407 encapsidated cargo, e.g., packaging of host ribosomal components (38-40). Furthermore, as our  
408 results suggest, another property that might confer unique cell-type-specific advantages to viruses  
409 is the differential modification of the virion RNA. Indeed, recent evidence shows that modifications  
410 like N<sup>6</sup>-methyladenosine (m6A) and 5-methylcytosine (m5C) can regulate viral RNA functionality  
411 in the cell (30, 41). Therefore, it is possible that such modifications also influence the infectivity of  
412 progeny viruses produced from said cells. However, how these modifications affect virus  
413 replication in a cell is still an open question. Indeed, information regarding the functional  
414 consequence of m5C or other RNA modifications on viral RNA is limited. Thus, while we may  
415 draw certain conclusions based on our current knowledge of known eukaryotic RNA  
416 modifications, the potential implications of arbovirus RNA methylation may be broader than we



417 are currently able to anticipate (42). We can hypothesize that differential viral methylation may  
418 alter host responses to infection, in that depending on the host or cell type, as well as the genomic  
419 context of methylation, presence or absence of m5C may either allow detection by and/or provide  
420 a mechanism of escape from RNA-binding proteins (e.g., Dicer, RIG-I, MDA5, TLRs, APOBEC3)  
421 involved in virus restriction or non-self RNA recognition that trigger downstream immune signaling  
422 and interferon production (43). Differential modifications of viral RNA may thus also regulate  
423 different cytological outcomes of arboviruses infection of arthropod and vertebrate cells i.e.  
424 persistence versus cell death.

425 It remains to be seen whether or not one or more of these situations occur during pathogen  
426 blocking and if W- and W+ viruses trigger differential innate immune responses in vertebrate cells.  
427 Based on our data, we propose a model in which our current estimates of m5C residues on W-  
428 viruses represent the "wild-type" epitranscriptome of mosquito-derived alphavirus. In naïve  
429 vertebrate cells, the presence of these signatures allows viruses to replicate efficiently following  
430 successful evasion of host innate immunity. In contrast, m5C hypomethylation of W+ viruses  
431 renders them more susceptible to host-induced restriction, thus impacting their ability to  
432 propagate. Aside from heightened immune susceptibility, the decreased fitness of  
433 hypomethylated W+ viruses could also result from reduced incoming viral RNA stability and/or  
434 translation.

435 Given that pharmacological inhibition of MTase activity impacts virus spread in mosquito cells, it  
436 is likely that W+ virus hypomethylation also influences dissemination in arthropod cells (1).  
437 However, it is also possible that other factors contribute to the reduced fitness of W+ viruses. In  
438 particular, our LC-MS/MS analyses suggest increased heterogeneity in m7G moiety abundance  
439 on W+ virion RNA, indicating either difference in abundance of internal m7G methylation  
440 signatures or a potential imbalance in viral RNA capping in the presence of *Wolbachia*. In addition,  
441 past work has shown that SINV populations derived from different hosts vary with regard to the  
442 ratios of capped and non-capped SINV RNA (44). Despite being important for alphavirus  
443 replication, non-capped SINV RNA alone are compromised in their ability to undergo translation,  
444 are more susceptible to RNA decay machineries, and have been shown to induce elevated innate  
445 immune response, all of which might contribute to the observed loss in infectivity.

446 Finally, the data presented here implicating epitranscriptomic regulation of alphaviruses unlocks  
447 multiple avenues of investigation, which include, but are not limited to the following. First, it is  
448 crucial to determine the genomic context of m5C and other RNA modifications on viral RNA for  
449 different hosts, cell types, and infection timeline, which may be achieved by long-read, direct RNA  
450 sequencing from virus-infected cells. Doing so would allow sequence-specific mapping of these  
451 signatures and help address whether virus infection is regulated solely via targeting viral RNA by  
452 cellular MTases. Furthermore, deriving mapping information might inform us whether  
453 modifications are directed to specific RNA elements that result in spatiotemporal changes in RNA  
454 structure and altered base-pairing, thus regulating virus RNA polymerase fidelity and/or  
455 translation in the cell. Additional areas of inquiry involve identifying cellular pathways responsible  
456 for determining the fate of W+ viruses and characterizing the functional consequences of  
457 abolishing highly conserved m5C residues on the viral RNA. This would allow further exploration  
458 into the effect of these signatures on RNA stability, gene expression, and/or packaging across  
459 arthropod and vertebrate cells. Lastly, unlike m6A-modifications, little is known regarding how  
460 m5C signatures are interpreted, i.e., how they are "read," "maintained," and "erased," in  
461 mammalian and, to an even lesser extent, in arthropod cells (42). Promising candidates include  
462 m5C-binding "reader" proteins ALYREF and YBX1, which function alongside the known cellular  
463 m5C MTase NSUN2 to influence mRNA nuclear transport and stability (45, 46). Following  
464 approaches described in recent studies, identification of these RNA-binding proteins, either viral

465 or host-derived, may be achieved via affinity-based immunoprecipitation of viral RNA and form  
466 the basis of future studies (47).

467 Like most other RNA viruses, Alphaviruses are limited in their coding capacity and are known to  
468 alter their genome structure under various cellular conditions to regulate aspects of their  
469 replication as a way to maximize viral genome functionality. Echoing this idea, the findings  
470 presented in this study add to our understanding of regulatory mechanisms adopted by these  
471 viruses to successfully navigate within and transition between vertebrate and arthropod host  
472 species.

## 473 **Materials and Methods**

### 474 **Insect and Mammalian Cell Culture**

475 RML12 *Aedes albopictus* cells with and *Wolbachia*-free *wMel* was grown at 24 °C in Schneider's  
476 insect media (Sigma-Aldrich) supplemented with 10% heat-inactivated fetal bovine serum  
477 (Corning), 1% each of L-Glutamine (Corning), non-essential amino acids (Corning), and penicillin-  
478 streptomycin-antimycotic (Corning). C710 *Aedes albopictus* cells with and *Wolbachia*-free were  
479 grown at 27 °C under 5% ambient CO<sub>2</sub> in 1X Minimal Essential Medium (Corning) supplemented  
480 with 5% heat-inactivated fetal bovine serum (Corning), 1% each of L-Glutamine (Corning), non-  
481 essential amino acids (Corning) and penicillin-streptomycin-antimycotic (Corning). Vertebrate  
482 baby hamster kidney fibroblast or BHK-21 cells were grown at 37 °C under 5% ambient CO<sub>2</sub> in  
483 1X Minimal Essential Medium (Corning) supplemented with 10% heat-inactivated fetal bovine  
484 serum (Corning), 1% each of L-Glutamine (Corning), non-essential amino acids (Corning) and  
485 penicillin-streptomycin-antimycotic (Corning). JW18 *Drosophila melanogaster* cells with and  
486 without *Wolbachia wMel* were grown at 24 °C in Shields, and Sang M3 insect media (Sigma-  
487 Aldrich) supplemented with 10% heat-inactivated fetal bovine serum, 1% each of L-Glutamine  
488 (Corning), non-essential amino acids (Corning), and penicillin-streptomycin-antimycotic  
489 (Corning).

### 490 **Mosquito rearing and blood meals**

491 *Aedes aegypti* mosquitoes either -infected and -uninfected with *Wolbachia* (*wAlbB* strain)  
492 (generously provided by Dr. Zhiyong Xi, Michigan State University, USA), were reared in an insect  
493 incubator (Percival Model I-36VL, Perry, IA, USA) at 28 °C and 75% humidity with 12 h light/dark  
494 cycle. Four to six-day-old, mated female mosquitoes were allowed to feed for one hour on  
495 approximately 10<sup>8</sup> PFUs of SINV (TE12-untagged) containing citrated rabbit blood (Fisher  
496 Scientific DRB030) supplemented with 1mM ATP (VWR), and 10% sucrose using a Hemotek  
497 artificial blood-feeding system (Hemotek, UK) maintained under a constant temperature of 37 °C.  
498 Engorged mosquitoes were then isolated and reared at 28 °C in the presence of male mosquitoes.  
499 For harvesting whole tissues, mosquitoes were harvested 5-7 days post blood meal before being  
500 snap-frozen in liquid nitrogen and stored at -80 °C before further processing. For salivary gland  
501 dissections, mosquitoes were kept immobilized on ice before dissection. Collected salivary gland  
502 tissues were washed three times in a cold, sterile saline solution (1XPBS) before being snap-  
503 frozen in liquid nitrogen and stored at -80 °C before further processing. Three salivary glands  
504 were pooled to create each biological replicate. Samples for qPCR and qRT-PCR were  
505 homogenized in TRIzol (Sigma Aldrich) reagent and further processed for nucleic acid  
506 extractions using manufacturer's protocols.

### 507 **Virion RNA extraction and transfection**

508 Virion encapsidated RNA was extracted from viruses (SINV-nLuc) were purified over a 27%  
509 sucrose cushion using TRIzol reagent (Sigma Aldrich) using the manufacturer's protocol. Post  
510 extraction, RNAs were DNase (RQ1 RNase-free DNase, NEB) treated according to the  
511 manufacturer's protocol to remove cellular contaminants, and viral RNA copies were quantified

512 via quantitative RT-PCR using primers probing for SINV nsP1 and E1 genomic regions (Table  
513 S1) and a standard curve comprised of linearized SINV infectious clone containing the full-length  
514 viral genome. To determine infectivity or replication kinetics of Sindbis virion RNA, equal copies  
515 of virion isolated RNA ( $10^5$  copies), quantified using qRT-PCR, were transfected into BHK-21 cells  
516 in serum-free Opti-MEM (Gibco). Transfection was carried out for 6 hours before the transfection  
517 inoculum was removed, and overlay was applied. Cells were fixed post-transfection using 10%  
518 (v/v) formaldehyde and stained with crystal violet to visualize plaques. To maximize the production  
519 of infectious units, equal mass (1  $\mu$ g) of virion (SINV-nLuc) isolated RNA derived from JW18 fly  
520 cells was transfected into BHK-21 cells. Transfection was carried out for 6 hours before the  
521 transfection inoculum was removed, and overlay was applied. Cells were fixed 48 (SINV) or 72  
522 (CHIKV) hours post-transfection using 10% (v/v) formaldehyde and stained with crystal violet to  
523 visualize plaque-forming units.

#### 524 **Viral replication assays**

525 The viral genome and sub-genome translation were quantified using cellular lysates following  
526 synchronized infections with reporter viruses (SINV-nLuc) or transfections with virion-derived  
527 RNA from the aforementioned viruses. At indicated times post-infection, samples were collected  
528 and homogenized in 1X Cell Culture Lysis Reagent (Promega). In addition, samples were mixed  
529 with NanoGlo luciferase reagent (Promega), incubated at room temperature for three minutes  
530 before luminescence was recorded using a Synergy H1 microplate reader (BioTech instruments).

#### 531 **Virus infection in cells and progeny virus production**

532 Virus stocks were generated from RML12, C710, or JW18 cells, either with or without *Wolbachia*  
533 or overexpressing DNMT2 orthologs by infecting naïve cells with the virus at an MOI of 10. In all  
534 cases, serum-free media was used for downstream virus purification. Media containing virus was  
535 collected five days post-infection for alphaviruses SINV (SINV-nLuc, TE12-untagged, TE3'2J-  
536 GFP, and TE3'2J-mCherry) and CHIKV (CHIKV18125-capsid-mKate). Virus stocks were  
537 subsequently purified and concentrated by ultracentrifugation (43K for 2.5 h) over a 27% (w/v)  
538 sucrose cushion dissolved in HNE buffer. Viral pellets were stored and aliquoted in HNE buffer  
539 before being used for all subsequent experiments.

#### 540 **DNMT2 overexpression in arthropod cells**

541 *Aedes albopictus* *AMt2* coding region was subcloned into PCR 2.1 TOPO vector (Invitrogen) by  
542 PCR amplification of cDNA generated using reverse transcribed from total cellular RNA isolated  
543 from C636 *Aedes albopictus* cells using Protoscript II RT (NEB) and oligo-dT primers (IDT). The  
544 coding region was validated via sequencing before being cloned into the pAFW expression vector  
545 (1111) (Gateway Vector Resources, DGRC), downstream of and in-frame with the 3X FLAG tag  
546 using the native restriction sites *AgeI* and *NheI* (NEB). Expression of both FLAG-tagged  
547 AaDNMT2 in mosquito cells was confirmed using qRT-PCR and Western Blots using an anti-  
548 FLAG monoclonal antibody (SAB4301135 - Sigma-Aldrich, 1:3000 dilution in 2% Milk in 1X TBS  
549 + 1% Tween-20) (Fig 4A). In addition, catalytic MTase mutant of *AMt2* (*AMt2*-C78G) was  
550 generated via site-directed mutagenesis (NEB, Q5 Site-Directed Mutagenesis Kit), using primers  
551 listed in the primer table (Table S1). *Drosophila* *Mt2* (FBgn0028707) cDNA clone (GM14972)  
552 obtained from DGRC (<https://dgrc.bio.indiana.edu/>) was cloned into the pAFW expression vector  
553 (1111) with an engineered *SaII* site (Gateway Vector Resources, DGRC) downstream of and in-  
554 frame with the 3X FLAG tag using Gibson assembly (HiFi DNA assembly mix, NEB). Expression  
555 of FLAG-tagged DNMT2 in fly cells was confirmed using qRT-PCR and Western Blots using an  
556 anti-FLAG monoclonal antibody (SAB4301135 - Sigma-Aldrich, 1:3000 dilution in 2% Milk in 1X  
557 TBS + 1% Tween-20). Catalytically inactive *Mt2* (*Mt2* C78A) variant was generated via site-  
558 directed mutagenesis (NEB, Q5 Site-Directed Mutagenesis Kit) using primers listed in the primer  
559 table (Table S1).

## 560 **Immunoprecipitation of DNMT2-viral RNA complexes**

561 JW18 fly cells and C710 mosquito cells were transfected with expression vectors FLAG-Mt2 and  
562 FLAG-AMt2 respectively for 48 hours before infection with SINV at MOI of 10. Control cells were  
563 transfected with the empty vector plasmid FLAG-empty. In addition, cells were treated for  
564 approximately 18h with 5  $\mu$ M 5-Azacytidine to covalently trap Mt2 or AMt2 with its target cellular  
565 RNA before RNA immunoprecipitation using an anti-FLAG antibody following manufacturer's  
566 protocols (SAB4301135 - Sigma-Aldrich, 1:100 dilution) (23).

## 567 **Real-time quantitative RT-PCR analyses**

568 Following total RNA extraction using TRIzol reagent, cDNA was synthesized using MMuLV  
569 Reverse Transcriptase (NEB) with random hexamer primers (Integrated DNA Technologies).  
570 Negative (no RT) controls were performed for each target. Quantitative RT-PCR analyses were  
571 performed using Brilliant III SYBR Green QPCR master mix (BioLine) with gene-specific primers  
572 according to the manufacturer's protocol and the Applied Bioscience StepOnePlus qRT-PCR  
573 machine (Life Technologies). The expression levels were normalized to the endogenous 18S  
574 rRNA expression using the delta-delta comparative threshold method ( $\Delta\Delta$ CT). Fold changes were  
575 determined using the comparative threshold cycle (CT) method (Table S1). Efficiencies for primer  
576 sets used in this study have been validated in our previous study (1).

## 577 **DNMT2 inhibition in mosquito cells**

578 Inhibition of *Aedes* DNMT2 activity in C710 cells was achieved using RNA and DNA cytosine  
579 methyltransferase inhibitors, 5-aza-cytidine (5-AZAC, Sigma-Aldrich) and 5-deoxy-azacytidine  
580 (DAC-5, Sigma-Aldrich). In each case, *Aedes albopictus* C710 cells were treated overnight with  
581 media containing either 5 $\mu$ M inhibitor diluted in Dimethyl sulfoxide (DMSO) or DMSO alone. Due  
582 to the poor stability of 5-AZAC, media containing fresh inhibitors was added every day post-  
583 infection (48).

## 584 **Live cell imaging**

585 Live-cell imaging experiments were carried out using a setup similar to our previous study (1).  
586 The growth of fluorescent reporter viruses in *Aedes albopictus* (C710) cells was monitored using  
587 Incucyte live-cell analysis system (Essen Biosciences, USA). *Aedes albopictus* C710 cells were  
588 grown under standard conditions as described earlier under 5% ambient CO<sub>2</sub> at 27 °C. Cells were  
589 plated to 75-80% confluency in 96-well plates to separate adjacent cells and preserve cell shape  
590 for optimal automated cell counting. To synchronously infect cells virus was adsorbed at 4°C. Post  
591 adsorption, cell monolayers were extensively washed with cold 1XPBS to remove any unbound  
592 virus particles, followed by the addition of warm media (37°C) to initialize virus internalization and  
593 infection. Cells per well were imaged and averaged across four distinct fields of view, each placed  
594 in one-quarter of the well every 2 hours throughout the infection. Total fluorescence generated by  
595 cells expressing the red fluorescent reporter mKate was calculated and normalized by the cell  
596 number for every sample. A manual threshold was set to minimize background signal via  
597 automated background correction at the time of data collection. Following the acquisition, data  
598 were analyzed in real-time using the native Incucyte ® Base Analysis Software.

## 599 **Quantification of RNA modification by LC-MS/MS**

600 Total RNA (3-7 $\mu$ g) was digested by nuclease P1 (10 Units) at 50°C for 16 hr. Additional Tris pH  
601 7.5 was then added to a final concentration of 100 mM to adjust, followed by the addition of calf  
602 intestinal alkaline phosphatase (CIP, NEB, 2Units). The mixture was incubated at 37°C for 1 hour  
603 to convert nucleotide 5'-monophosphates to their respective nucleosides. Next, 10 $\mu$ l of RNA  
604 samples were diluted to 30  $\mu$ L and filtered (0.22  $\mu$ m pore size). 10 $\mu$ L of the sample was used for  
605 LC-MS/MS. Briefly, nucleosides were separated on a C18 column (Zorbax Eclipse Plus C18

606 column, 2.1 x 50mm, 1.8 Micron) paired with an Agilent 6490 QQQ triple-quadrupole LC mass  
607 spectrometer using multiple-reaction monitoring in positive-ion mode. The nucleosides were  
608 quantified using the retention time of the pure standards and the nucleoside to base ion mass  
609 transitions of 268.1 to 136 (A), 244.1 to 112 (C), 284.2 to 152 (G), 258 to 126 (m3C and m5C),  
610 282.1 to 150 (m6A), 298 to 166 (m7G). Standard calibration curves were generated for each  
611 nucleoside by fitting the signal intensities against concentrations of pure-nucleoside preparations.  
612 The curves were used to determine the concentration of the respective nucleoside in the sample.  
613 The A, G, and C standards were purchased from ACROS ORGANICS; m5C was purchased from  
614 BioVision; m7G, m1G, and m3C were purchased from Carbosynth, m6G and m6A were  
615 purchased from Berry's Associates, and m1A was from Cayman Chemical Company. The  
616 modification level on the nucleosides was calculated as the ratio of modified: unmodified.

#### 617 **Data availability**

618 The full Incucyte dataset is available in the form of an excel sheet labeled Dataset S1.

#### 619 **Statistical analyses of experimental data**

620 All statistical analyses were conducted using GraphPad Prism 8 (GraphPad Software Inc., San  
621 Diego, CA).

#### 622 **Graphics**

623 Graphical assets made in © BioRender - [biorender.com](https://www.biorender.com).

#### 624 **Acknowledgments**

625 We thank members of Hardy, Newton, Danthi, Mukhopadhyay, and Patton Labs for critical  
626 proofreading of the manuscript and for fostering ideas through helpful discussions. In addition, we  
627 thank Dr. David Mackenzie-Liu for generating the original cloning vector with the SacI restriction  
628 site. Finally, we thank our colleagues outside of IU for their generosity in sharing reagents,  
629 including Dr. Horacio Frydman, Boston University, for providing us Aa23 and C710 *Aedes*  
630 *albopictus* cells, Dr. William Sullivan for providing us with JW18 *Drosophila melanogaster* cells,  
631 and Dr. Zhiyong Xi, Michigan State University for providing us *Aedes aegypti* mosquitoes. This  
632 work was supported by NSF award to ILGN and RWH (MTM2025389), NIH R01 to ILGN  
633 (R01AI144430), NIH R21 to RWH (R21AI153785).

634

#### 635 **References**

- 636 1. Bhattacharya T, Newton ILG, Hardy RW. Viral RNA is a target for Wolbachia-mediated  
637 pathogen blocking. *PLoS Pathog.* 2020;16(6):e1008513.
- 638 2. Díaz-Sánchez S, Hernández-Jarguín A, Torina A, Fernández de Mera I, Estrada-Peña A,  
639 Villar M, et al. Biotic and abiotic factors shape the microbiota of wild-caught populations of the  
640 arbovirus vector *Culicoides imicola*. *Insect molecular biology.* 2018;27(6):847-61.
- 641 3. Bellone R, Failloux A-B. Temperature in shaping mosquito-borne viruses transmission.  
642 *Frontiers in Microbiology.* 2020;11:2388.
- 643 4. Tabachnick WJ. Ecological effects on arbovirus-mosquito cycles of transmission. *Current*  
644 *opinion in virology.* 2016;21:124-31.
- 645 5. Hegde S, Rasgon JL, Hughes GL. The microbiome modulates arbovirus transmission in  
646 mosquitoes. *Current opinion in virology.* 2015;15:97-102.
- 647 6. Cirimotich CM, Ramirez JL, Dimopoulos G. Native microbiota shape insect vector  
648 competence for human pathogens. *Cell host & microbe.* 2011;10(4):307-10.

- 649 7. Lindsey ARI, Bhattacharya T, Hardy RW, Newton ILG. Wolbachia and virus alter the host  
650 transcriptome at the interface of nucleotide metabolism pathways. *bioRxiv*.  
651 2020:2020.06.18.160317.
- 652 8. Lindsey ARI, Bhattacharya T, Newton ILG, Hardy RW. Conflict in the Intracellular Lives of  
653 Endosymbionts and Viruses: A Mechanistic Look at Wolbachia-Mediated Pathogen-blocking.  
654 *Viruses*. 2018;10(4).
- 655 9. Bhattacharya T, Newton IL, Hardy RW. Wolbachia elevates host methyltransferase  
656 expression to block an RNA virus early during infection. *PLoS pathogens*. 2017;13(6):e1006427.
- 657 10. Bhattacharya T, Newton ILG. Mi Casa es Su Casa: how an intracellular symbiont  
658 manipulates host biology. *Environ Microbiol*. 2017.
- 659 11. Schultz M, Tan A, Gray C, Isern S, Michael S, Frydman HM, et al. Wolbachia wStri blocks  
660 Zika virus growth at two independent stages of viral replication. *MBio*. 2018;9(3).
- 661 12. Kaur R, Shropshire JD, Cross KL, Leigh B, Mansueto AJ, Stewart V, et al. Living in the  
662 endosymbiotic world of Wolbachia: A centennial review. *Cell Host & Microbe*. 2021.
- 663 13. Caragata EP, Dutra HLC, Moreira LA. Inhibition of Zika virus by Wolbachia in *Aedes aegypti*.  
664 *Microbial cell*. 2016;3(7):293.
- 665 14. Rainey SM, Martinez J, McFarlane M, Juneja P, Sarkies P, Lulla A, et al. Wolbachia Blocks  
666 Viral Genome Replication Early in Infection without a Transcriptional Response by the  
667 Endosymbiont or Host Small RNA Pathways. *PLoS Pathog*. 2016;12(4):e1005536.
- 668 15. Geoghegan V, Stainton K, Rainey SM, Ant TH, Dowle AA, Larson T, et al. Perturbed  
669 cholesterol and vesicular trafficking associated with dengue blocking in Wolbachia-infected  
670 *Aedes aegypti* cells. *Nature communications*. 2017;8(1):1-10.
- 671 16. Zabalou S, Riegler M, Theodorakopoulou M, Stauffer C, Savakis C, Bourtzis K. Wolbachia-  
672 induced cytoplasmic incompatibility as a means for insect pest population control. *Proceedings*  
673 *of the National Academy of Sciences*. 2004;101(42):15042-5.
- 674 17. Beckmann JF, Ronau JA, Hochstrasser M. A Wolbachia deubiquitylating enzyme induces  
675 cytoplasmic incompatibility. *Nature microbiology*. 2017;2(5):1-7.
- 676 18. Caragata EP, Dutra HL, Sucupira PH, Ferreira AG, Moreira LA. Wolbachia as translational  
677 science: controlling mosquito-borne pathogens. *Trends in Parasitology*. 2021.
- 678 19. Indriani C, Tantowijoyo W, Rancès E, Andari B, Prabowo E, Yusdi D, et al. Reduced dengue  
679 incidence following deployments of Wolbachia-infected *Aedes aegypti* in Yogyakarta, Indonesia:  
680 a quasi-experimental trial using controlled interrupted time series analysis. *Gates open research*.  
681 2020;4.
- 682 20. Nazni WA, Hoffmann AA, NoorAfizah A, Cheong YL, Mancini MV, Golding N, et al.  
683 Establishment of Wolbachia strain wAlbB in Malaysian populations of *Aedes aegypti* for dengue  
684 control. *Current biology*. 2019;29(24):4241-8. e5.
- 685 21. Thomas S, Verma J, Woolfit M, O'Neill SL. Wolbachia-mediated virus blocking in mosquito  
686 cells is dependent on XRN1-mediated viral RNA degradation and influenced by viral replication  
687 rate. *PLoS pathogens*. 2018;14(3):e1006879.
- 688 22. Zhang G, Hussain M, O'Neill SL, Asgari S. Wolbachia uses a host microRNA to regulate  
689 transcripts of a methyltransferase, contributing to dengue virus inhibition in *Aedes aegypti*. *Proc*  
690 *Natl Acad Sci U S A*. 2013;110(25):10276-81.

- 691 23. Khoddami V, Cairns BR. Transcriptome-wide target profiling of RNA cytosine  
692 methyltransferases using the mechanism-based enrichment procedure Aza-IP. *Nat Protoc.*  
693 2014;9(2):337-61.
- 694 24. Goll MG, Kirpekar F, Maggert KA, Yoder JA, Hsieh CL, Zhang X, et al. Methylation of  
695 tRNA<sup>Asp</sup> by the DNA methyltransferase homolog Dnmt2. *Science.* 2006;311(5759):395-8.
- 696 25. Singh V, Sharma P, Capalash N. DNA methyltransferase-1 inhibitors as epigenetic therapy  
697 for cancer. *Current cancer drug targets.* 2013;13(4):379-99.
- 698 26. Pleyer L, Greil R. Digging deep into "dirty" drugs—modulation of the methylation  
699 machinery. *Drug metabolism reviews.* 2015;47(2):252-79.
- 700 27. Jeltsch A, Ehrenhofer-Murray A, Jurkowski TP, Lyko F, Reuter G, Ankri S, et al. Mechanism  
701 and biological role of Dnmt2 in nucleic acid methylation. *RNA biology.* 2017;14(9):1108-23.
- 702 28. Jurkowski TP, Meusburger M, Phalke S, Helm M, Nellen W, Reuter G, et al. Human DNMT2  
703 methylates tRNA<sup>Asp</sup> molecules using a DNA methyltransferase-like catalytic mechanism. *Rna.*  
704 2008;14(8):1663-70.
- 705 29. Durdevic Z, Hanna K, Gold B, Pollex T, Cherry S, Lyko F, et al. Efficient RNA virus control in  
706 *Drosophila* requires the RNA methyltransferase Dnmt2. *EMBO reports.* 2013;14(3):269-75.
- 707 30. Gokhale NS, McIntyre ABR, McFadden MJ, Roder AE, Kennedy EM, Gandara JA, et al. N6-  
708 Methyladenosine in Flaviviridae Viral RNA Genomes Regulates Infection. *Cell Host Microbe.*  
709 2016;20(5):654-65.
- 710 31. McIntyre W, Netzband R, Bonenfant G, Biegel JM, Miller C, Fuchs G, et al. Positive-sense  
711 RNA viruses reveal the complexity and dynamics of the cellular and viral epitranscriptomes during  
712 infection. *Nucleic Acids Res.* 2018;46(11):5776-91.
- 713 32. Bhattacharya T, Rice DW, Hardy RW, Newton I. Adaptive evolution in DNMT2 supports its  
714 role in the dipteran immune response. *bioRxiv.* 2020.
- 715 33. Dubin DT, Stollar V. Methylation of Sindbis virus "26S" messenger RNA. *Biochem Biophys*  
716 *Res Commun.* 1975;66(4):1373-9.
- 717 34. Frey TK, Gard DL, Strauss JH. Replication of Sindbis virus. VII. Location of 5-methyl cytidine  
718 residues in virus-specific RNA. *Virology.* 1978;89(2):450-60.
- 719 35. Gokhale NS, McIntyre ABR, Mattocks MD, Holley CL, Lazear HM, Mason CE, et al. Altered  
720 m(6)A Modification of Specific Cellular Transcripts Affects Flaviviridae Infection. *Mol Cell.*  
721 2020;77(3):542-55.e8.
- 722 36. Tsai K, Cullen BR. Epigenetic and epitranscriptomic regulation of viral replication. *Nat Rev*  
723 *Microbiol.* 2020:1-12.
- 724 37. Mackenzie-Liu D, Sokoloski KJ, Purdy S, Hardy RW. Encapsidated Host Factors in  
725 Alphavirus Particles Influence Midgut Infection of *Aedes aegypti*. *Viruses.* 2018;10(5).
- 726 38. Sokoloski KJ, Snyder AJ, Liu NH, Hayes CA, Mukhopadhyay S, Hardy RW. Encapsidation of  
727 host-derived factors correlates with enhanced infectivity of Sindbis virus. *J Virol.*  
728 2013;87(22):12216-26.
- 729 39. Dunbar CA, Rayaprolu V, Wang JC, Brown CJ, Leishman E, Jones-Burrage S, et al. Dissecting  
730 the Components of Sindbis Virus from Arthropod and Vertebrate Hosts: Implications for  
731 Infectivity Differences. *ACS Infect Dis.* 2019;5(6):892-902.
- 732 40. Hsieh P, Rosner MR, Robbins PW. Host-dependent variation of asparagine-linked  
733 oligosaccharides at individual glycosylation sites of Sindbis virus glycoproteins. *J Biol Chem.*  
734 1983;258(4):2548-54.

- 735 41. Courtney DG, Tsai K, Bogerd HP, Kennedy EM, Law BA, Emery A, et al. Epitranscriptomic  
736 Addition of m(5)C to HIV-1 Transcripts Regulates Viral Gene Expression. *Cell Host Microbe*.  
737 2019;26(2):217-27.e6.
- 738 42. Netzband R, Pager CT. Epitranscriptomic marks: Emerging modulators of RNA virus gene  
739 expression. *Wiley Interdiscip Rev RNA*. 2020;11(3):e1576.
- 740 43. Durbin AF, Wang C, Marcotrigiano J, Gehrke L. RNAs Containing Modified Nucleotides Fail  
741 To Trigger RIG-I Conformational Changes for Innate Immune Signaling. *mBio*. 2016;7(5).
- 742 44. Sokoloski K, Haist K, Morrison T, Mukhopadhyay S, Hardy R. Noncapped alphavirus  
743 genomic RNAs and their role during infection. *Journal of virology*. 2015;89(11):6080-92.
- 744 45. Chen X, Li A, Sun BF, Yang Y, Han YN, Yuan X, et al. 5-methylcytosine promotes  
745 pathogenesis of bladder cancer through stabilizing mRNAs. *Nat Cell Biol*. 2019;21(8):978-90.
- 746 46. Yang X, Yang Y, Sun BF, Chen YS, Xu JW, Lai WY, et al. 5-methylcytosine promotes mRNA  
747 export - NSUN2 as the methyltransferase and ALYREF as an m(5)C reader. *Cell Res*.  
748 2017;27(5):606-25.
- 749 47. Garcia-Moreno M, Järvelin AI, Castello A. Unconventional RNA-binding proteins step into  
750 the virus–host battlefield. *Wiley Interdisciplinary Reviews: RNA*. 2018;9(6):e1498.
- 751 48. Israili ZH, Vogler WR, Mingioli ES, Pirkle JL, Smithwick RW, Goldstein JH. The disposition  
752 and pharmacokinetics in humans of 5-azacytidine administered intravenously as a bolus or by  
753 continuous infusion. *Cancer Res*. 1976;36(4):1453-61.
- 754
